# Supplementary material
Source: PubMed Central journal article supplement (PMC5596637)
Supplement: NIHMS901017-supplement-Supporting_Information.pdf [file NIHMS901017-supplement-Supporting_Information.pdf]

## **New *Phytologist* Supporting Information**

**Article title:** The Auxin Response Factor MONOPTEROS controls meristem function and organogenesis in both the shoot and root through the direct regulation of *PIN* genes

**Authors:** Naden T. Krogan, Danielle Marcos, Aaron I. Weiner, Thomas Berleth

### **The following Supporting Information is available for this article:**

**Fig. S1** *Arabidopsis* root gravitropic responses.

**Fig. S2** *mp nph4 MP-GR<sup>er</sup>* root and shoot apical meristem activity depends directly on dexamethasone (DEX) dosage in *Arabidopsis*.

**Fig. S3** *Arabidopsis PIN FORMED (PIN)::β-glucuronidase (GUS)* expression patterns.

**Table S1** Reverse transcription-polymerase chain reaction (RT-PCR) primer sequences.

**Table S2** Primer sequences used to create electrophoretic mobility shift assay (EMSA) probes.

**Table S3** Chromatin immunoprecipitation (ChIP) primer sequences.

**Table S4a** β-Glucuronidase (GUS)-staining conditions of auxin-induced *Arabidopsis* tissues.

**Table S4b** β-Glucuronidase (GUS)-staining conditions of *Arabidopsis* tissues not auxin treated.

# Supporting Information - Figs S1-S3; Tables S1-S4

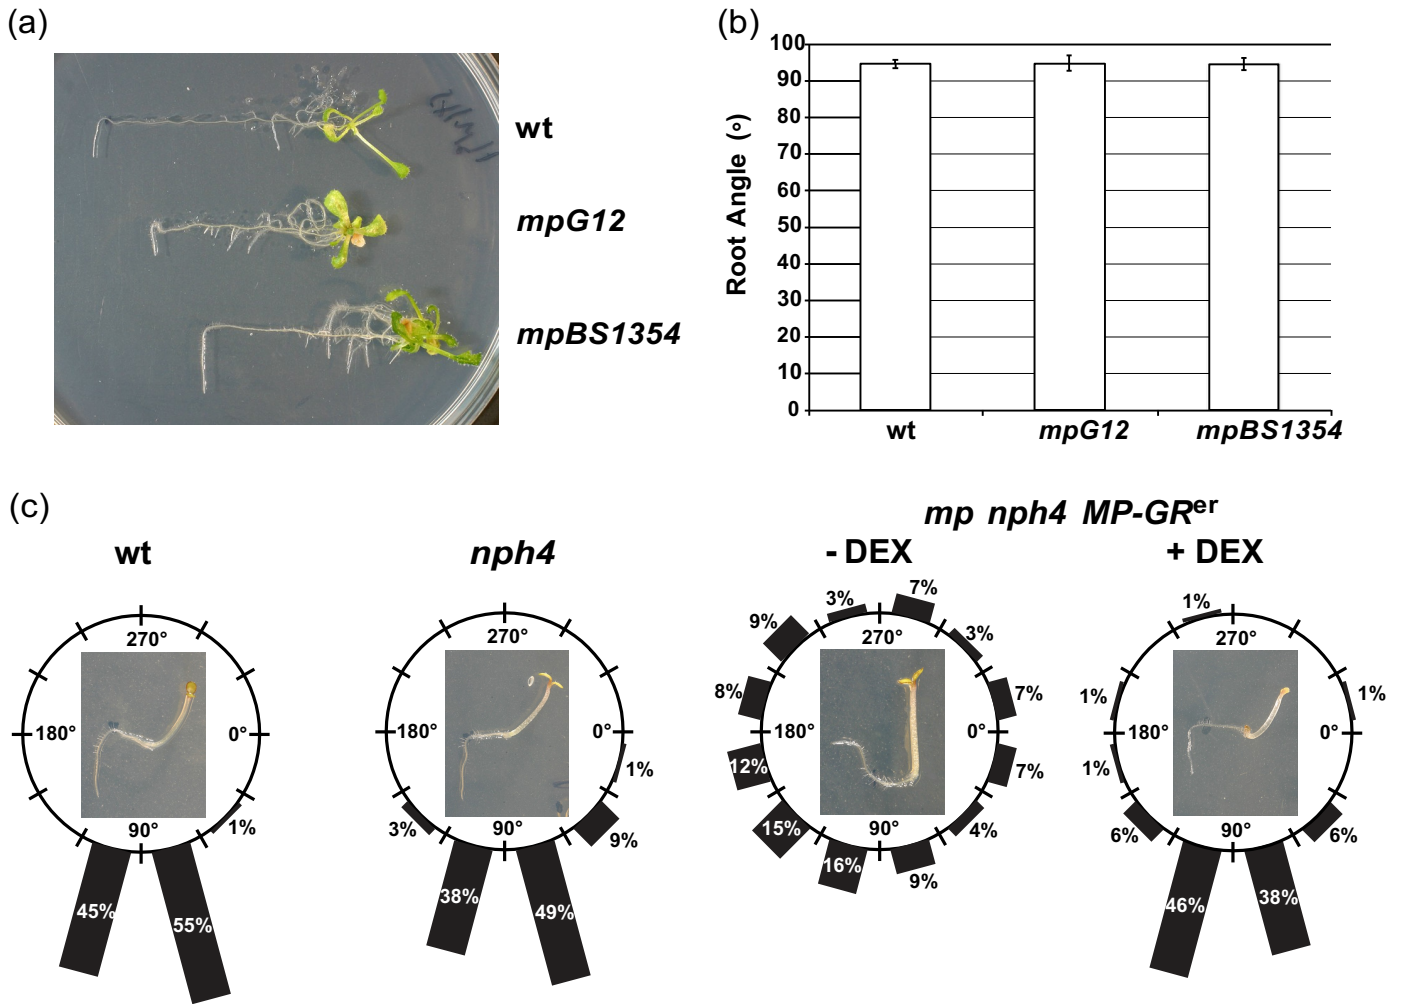

**Fig. S1** *Arabidopsis* root gravitropic responses.

(a,b) *monopteros* (*mp*) seedlings were germinated and grown on 5 $\mu$ M  $\alpha$ -naphthaleneacetic acid (NAA) for 16d. Individuals exhibiting adventitious rooting were transferred to fresh media lacking NAA and grown vertically for 5d. Vertically grown seedlings were then turned 90° clockwise and transferred into the dark for 24h. The position of each root relative to its original gravistimulated orientation (0°) was then measured. Control wild-type seedlings were treated as above except these were initially grown on 5 $\mu$ M NAA for 6d. (a) Representative seedlings of each genotype at the end of the assay with the gravity vector downward. (b) Quantitative assessment of root bending in response to gravitropic stimulus, showing that adventitious *mp* roots exhibit normal gravitropism. Columns represent mean values +/- s.e.m.

(c) 2d after germination (DAG) light-grown seedlings were arranged vertically on agar media, turned 90° clockwise, and transferred into the dark for 24h. Root positions relative to the original gravistimulated orientation (0°) are depicted (gravity vector downward). *mp nph4 MP-GR<sup>er</sup>* seedlings were grown in the absence of dexamethasone (-DEX), or were grown on 15 $\mu$ M DEX during the initial 2d light period then transferred to DEX-free media for 24h of gravistimulation (+DEX). Only *mp nph4 MP-GR<sup>er</sup>* roots that exhibited significant growth were measured. Bars: 2mm.

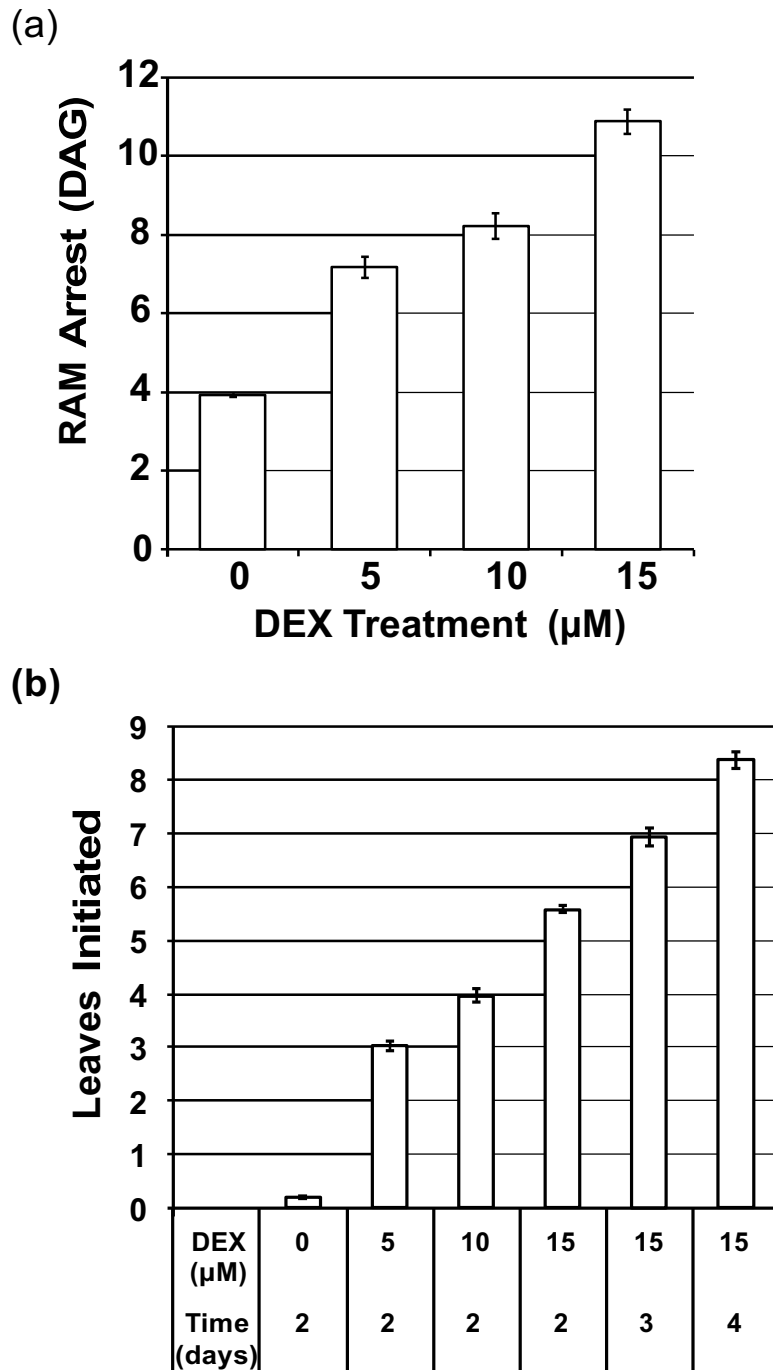

**Fig. S2** *mp nph4 MP-GR<sup>er</sup>* root and shoot apical meristem activity depends directly on dexamethasone (DEX) dosage in *Arabidopsis*.

(a) *mp nph4 MP-GR<sup>er</sup>* seedlings were germinated and grown on varying concentrations of DEX for 2d. Individuals were subsequently transferred to DEX-free media, and the age of each seedling when root growth arrested was recorded. Columns represent mean values  $\pm$  s.e.m.

(b) *mp nph4 MP-GR<sup>er</sup>* seedlings were germinated and grown on varying concentrations of DEX for 2 to 4d. Individuals with primary roots were subsequently transferred to DEX-free media and the number of leaves produced was recorded 21d later. Columns represent mean values  $\pm$  s.e.m.

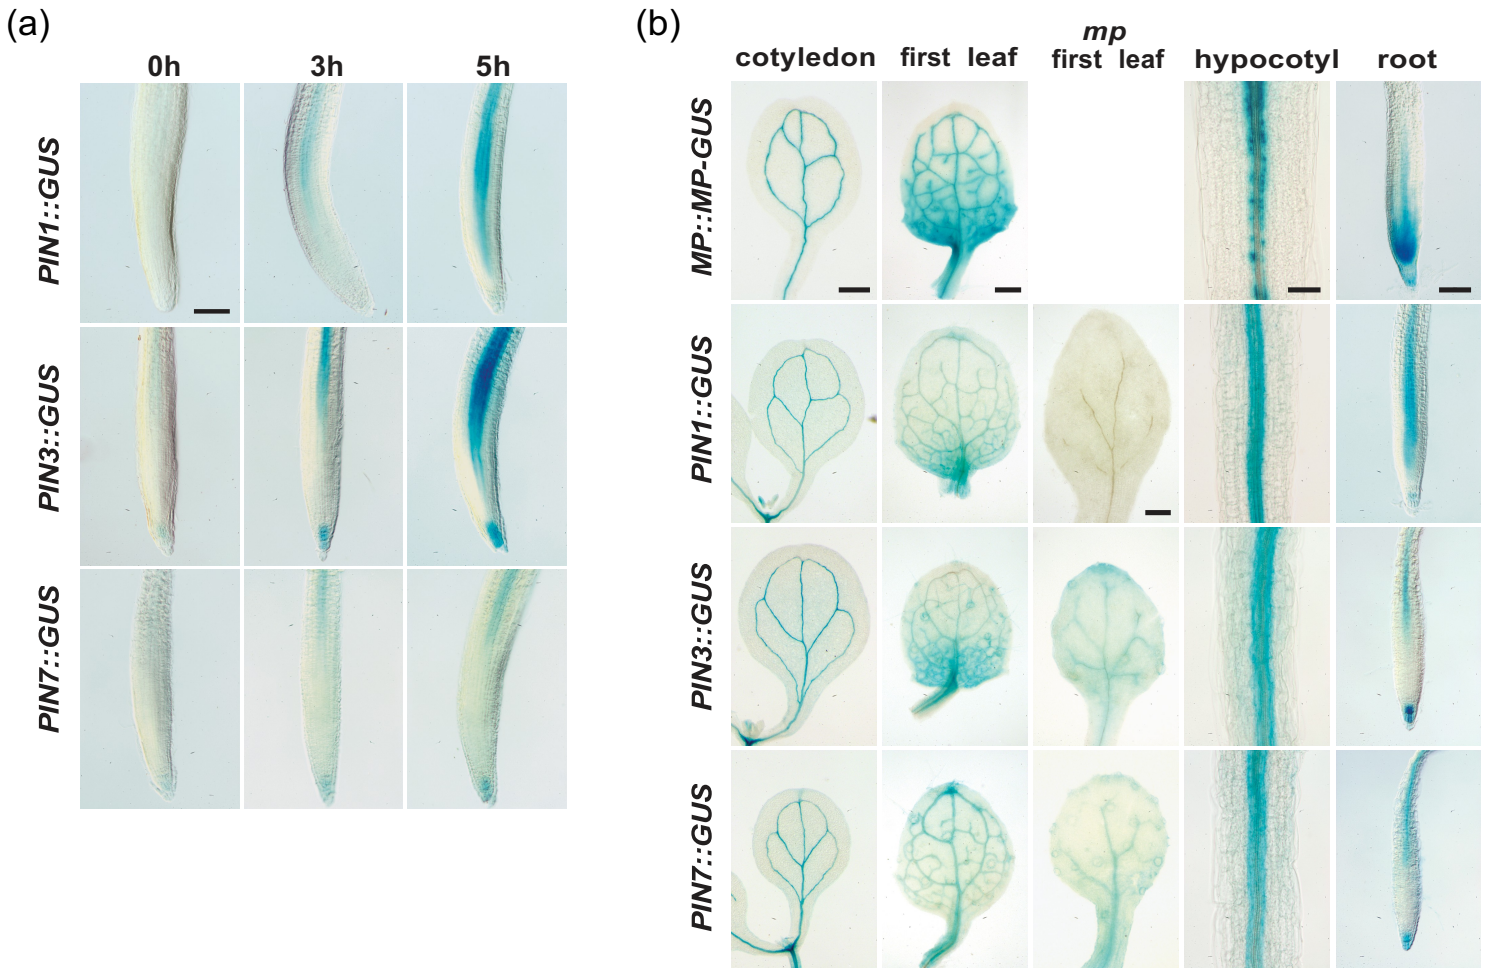

**Fig. S3** *Arabidopsis* *PIN FORMED* (*PIN*:: $\beta$ -glucuronidase (*GUS*)) expression patterns.

(a) Expression patterns of *PIN*::*GUS* transcriptional reporter genes in primary roots are shown. 5d after germination (DAG) seedlings were treated for 0, 3 or 5h with 1 $\mu$ M 2,4-dichlorophenoxyacetic acid (2,4-D). Each image shows a staining pattern that is representative of the majority of viewed samples. Bar: 0.1mm.

(b) Expression patterns of a functional *MP*::*MP-GUS* translational reporter and *PIN*::*GUS* transcriptional reporter genes are shown. All expression patterns are depicted in wild type except for images in the “*mp* first leaf” column. Cotyledons and leaves are from 6DAG seedlings, while hypocotyls and roots are from 5DAG seedlings.

Bars: “cotyledon” 0.5mm; “first leaf” 0.2mm; “hypocotyl” and “root” 0.1mm.

**Table S1** Reverse transcription-polymerase chain reaction (RT-PCR) primer sequences.

| Gene        | AGI number | Primer  | Sequence (5'-3')            |
|-------------|------------|---------|-----------------------------|
| <i>PIN1</i> | At1g73590  | forward | GATGTTTTCGCCCAACTGG         |
|             |            | reverse | TGTTACCGAAACTAACTCTTCCC     |
| <i>PIN3</i> | At1g70940  | forward | AAACCCGAAAGACGTTAATACG      |
|             |            | reverse | CTTCTTCTTTTCCGGCGAAAC       |
| <i>PIN7</i> | At1g23080  | forward | TGGTGGTACTAATATGACTCCTCGTC  |
|             |            | reverse | GGTACAGTTTCACCCGTTTCTATAGC  |
| <i>ROC1</i> | At4g38740  | forward | CAAACCTCTTCTTCAGTCTGATAGAGA |
|             |            | reverse | GAGTGCTCATTCTTATTTCTGGTAG   |
| <i>ACT7</i> | At5g09810  | forward | GGTGAGGATATTCAGCCACTTGTCTG  |
|             |            | reverse | TGTGAGATCCCGACCCGCAAGATC    |

**Table S2** Primer sequences used to create electrophoretic mobility shift assay (EMSA) probes.

| Gene        | AGI number | Primer  | Sequence (5'-3')          |
|-------------|------------|---------|---------------------------|
| <i>PIN1</i> | At1g73590  | forward | AAATATGGTATTTTCTCAACGGAC  |
|             |            | reverse | ATCTTTTGTTTCGCCGAGAAGAG   |
| <i>PIN3</i> | At1g70940  | forward | CCAAGGAGTAATTGAGTGTTGCC   |
|             |            | reverse | AAGGAGACAAGATGGGCTGGAG    |
| <i>PIN7</i> | At1g23080  | forward | GTTTTCACAATCCGATTTTGTAC   |
|             |            | reverse | GTAAGAAATTAAGATGAAAAGAGAC |

**Table S3** Chromatin immunoprecipitation (ChIP) primer sequences.

| Gene        | AGI number | Primer            | Sequence (5'-3')           |
|-------------|------------|-------------------|----------------------------|
| <i>PIN1</i> | At1g73590  | forward           | GTGGTCTCTTCTCAACTCACT      |
|             |            | reverse           | TTTTCCACCATTTGACAGAGCC     |
| <i>PIN3</i> | At1g70940  | <b>A</b> -forward | CCAAGGAGTAATTGAGTGTTGCC    |
|             |            | <b>A</b> -reverse | AATAAGGAGACAAGATGGGCTGG    |
| <i>PIN3</i> | At1g70940  | <b>B</b> -forward | TGAAAAGCAAAGATTAGGGGACAG   |
|             |            | <b>B</b> -reverse | TAAGAAGAAGGTCTACATGTGGCA   |
| <i>PIN7</i> | At1g23080  | <b>A</b> -forward | AAGTGGTGGAGAAGCTTCAAAGA    |
|             |            | <b>A</b> -reverse | TAAACGTTACTGAGAGATGGCCC    |
| <i>PIN7</i> | At1g23080  | <b>B</b> -forward | TATGTGTGACATGTAGACAGTCAGT  |
|             |            | <b>B</b> -reverse | AGCTTTCCCCTAATTTATGTACCAT  |
| <i>PP2A</i> | At1g59830  | forward           | CAAACCAAAGACGAGCCAGAGC     |
|             |            | reverse           | ACCGAATCGTTGTAAATCGAACAC   |
| <i>ACT7</i> | At5g09810  | forward           | GGTGAGGATATTCAGCCACTTGTCTG |
|             |            | reverse           | ACCATGACACCAGTGTGCCT       |

**Table S4a**  $\beta$ -Glucuronidase (GUS)-staining conditions of auxin-induced *Arabidopsis* tissues.

| Transgene        | Tissue | [Fe salt] (mM) | Incubation time (h) |
|------------------|--------|----------------|---------------------|
| <i>PIN1::GUS</i> | root   | 1              | 2.75                |
| <i>PIN3::GUS</i> | root   | 1              | 1                   |
| <i>PIN7::GUS</i> | root   | 1              | 3                   |

**Table S4b**  $\beta$ -Glucuronidase (GUS)-staining conditions of *Arabidopsis* tissues not auxin treated.

| Transgene         | Tissue    | [Fe salt] (mM) | Incubation time (h) |
|-------------------|-----------|----------------|---------------------|
| <i>MP::MP-GUS</i> | cotyledon | 1              | 5.5                 |
|                   | leaf      | 5              | 23                  |
|                   | hypocotyl | 1              | 23                  |
|                   | root      | 1              | 23                  |
| <i>PIN1::GUS</i>  | cotyledon | 5              | 5                   |
|                   | leaf      | 5              | 5                   |
|                   | hypocotyl | 5              | 6                   |
|                   | root      | 0.5            | 1.75                |
| <i>PIN3::GUS</i>  | cotyledon | 5              | 1.5                 |
|                   | leaf      | 5              | 1.5                 |
|                   | hypocotyl | 5              | 2                   |
|                   | root      | 1              | 2                   |
| <i>PIN7::GUS</i>  | cotyledon | 5              | 2                   |
|                   | leaf      | 5              | 2                   |
|                   | hypocotyl | 5              | 1                   |
|                   | root      | 1              | 3.25                |
